# Supplementary material
Source: publisher site journal article supplement (https://www.spandidos-publications.com/1865/downloadSupplementary)

Figure S1. The mRNA level of ZFP91 was detected by RT-qPCR. The BC MDA-MB-231 cells were transfected with miR-188-5p mimics and miR-NC, and mRNA of ZFP91 was detected by RT-qPCR. The data are represented as the mean  $\pm$  SD (n=3). \*P<0.05. The comparison between two groups was evaluated by t-test. BC, breast cancer; ZFP91, zinc finger protein 91.

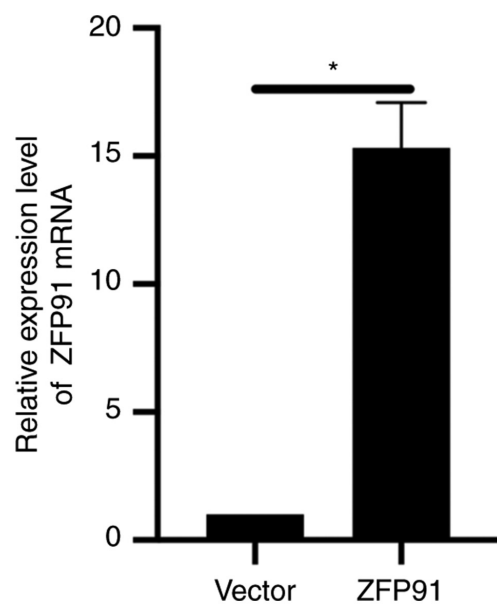

Figure S2. Expression of NF- $\kappa$ B p65(Rel) as detected by western blot analysis in BC MDA-MB-231 cells. (A) The expression of NF- $\kappa$ Bp65 and RelB under miR-188-5p mimic treatment. (B) Expression of NF- $\kappa$ Bp65 and RelB under miR-188-5p mimic treatment and/or ZFP91 overexpression. The data are represented as the mean  $\pm$  SD (n=3). \*P<0.05. One-way ANOVA followed by Tukey's test was used to evaluate the difference for multiple comparisons. BC, breast cancer; ZFP91, zinc finger protein 91.

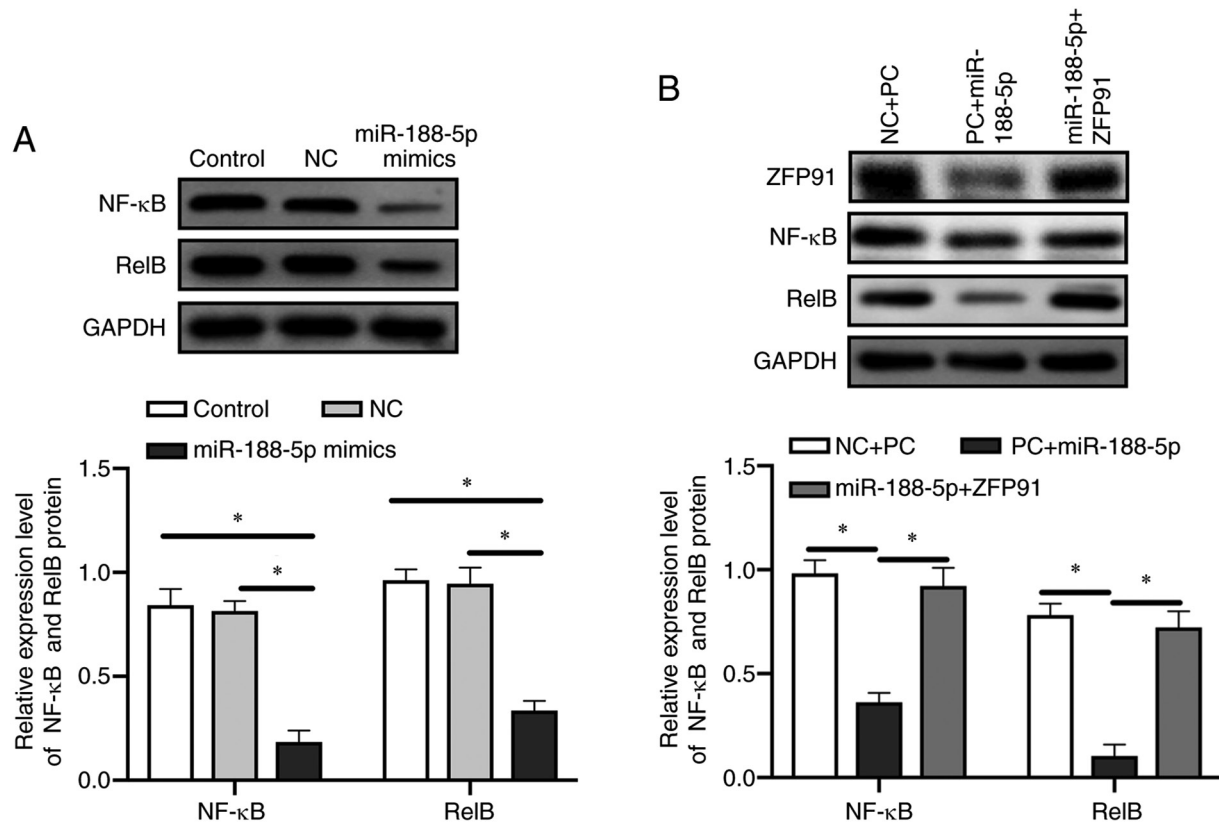

Supplement: Supplementary file 1 [file downloadSupplementary]
